# Supplementary material
Source: PubMed Central journal article supplement (PMC3697359)
Supplement: AAC.00268-13_zac999101923so1.pdf [file AAC.00268-13_zac999101923so1.pdf]

**SUPPLEMENTARY TABLE 1.** Minimal-inhibitory concentrations of  $\beta$ -lactam, fluoroquinolone, and aminoglycoside antibiotics for *P. aeruginosa* peptidoglycan-active enzyme mutants.

| Strain <sup>a</sup> | Minimum-Inhibitory Concentrations ( $\mu\text{g/mL}$ ) <sup>b</sup> |      |      |      |       |     |
|---------------------|---------------------------------------------------------------------|------|------|------|-------|-----|
|                     | PP                                                                  | CT   | TZ   | IP   | CI    | TM  |
| PAO1                | 4                                                                   | 12   | 0.75 | 1    | 0.125 | 1.5 |
| <i>ponA</i> (PBP1a) | 4                                                                   | 8    | 0.75 | 1    | 0.125 | 1   |
| <i>mrcB</i> (PBP1b) | 3                                                                   | 8    | 0.5  | 1    | 0.125 | 1   |
| <i>pbpC</i> (PBP3a) | 4                                                                   | 12   | 1    | 1.5  | 0.125 | 1.5 |
| <i>dacB</i> (PBP4)  | 64                                                                  | >256 | 16   | 1    | 0.125 | 1   |
| <i>dacC</i> (PBP6)  | 4                                                                   | 8    | 0.5  | 1    | 0.125 | 1   |
| <i>pbpG</i> (PBP7)  | 4                                                                   | 12   | 0.75 | 1    | 0.125 | 1   |
| <i>mgtA</i>         | 4                                                                   | 8    | 1    | 2    | 0.125 | 1   |
| <i>mltA</i>         | 4                                                                   | 8    | 0.5  | 1.5  | 0.125 | 1   |
| <i>mltB</i>         | 8                                                                   | 12   | 1.5  | 1.5  | 0.19  | 1   |
| <i>mltD</i>         | 4                                                                   | 8    | 0.75 | 1.5  | 0.125 | 1   |
| <i>mltF</i>         | 2                                                                   | 6    | 0.38 | 1    | 0.125 | 1   |
| <i>mltF2</i>        | 4                                                                   | 8    | 0.75 | 1    | 0.125 | 1   |
| <i>slt</i>          | 1.5                                                                 | 6    | 0.19 | 1    | 0.125 | 1   |
| <i>sltB1</i>        | 12                                                                  | 16   | 1    | 0.75 | 0.125 | 1.5 |
| <i>sltG</i>         | 4                                                                   | 12   | 1    | 1.5  | 0.125 | 1   |
| <i>sltH</i>         | 4                                                                   | 8    | 0.75 | 1    | 0.125 | 1   |

<sup>a</sup>Protein names are listed in parentheses when different from gene name.

<sup>b</sup>Abbreviations: PP, piperacillin; CT, cefotaxime; TZ, ceftazidime; IP, imipenem; CI, ciprofloxacin; TM, tobramycin.

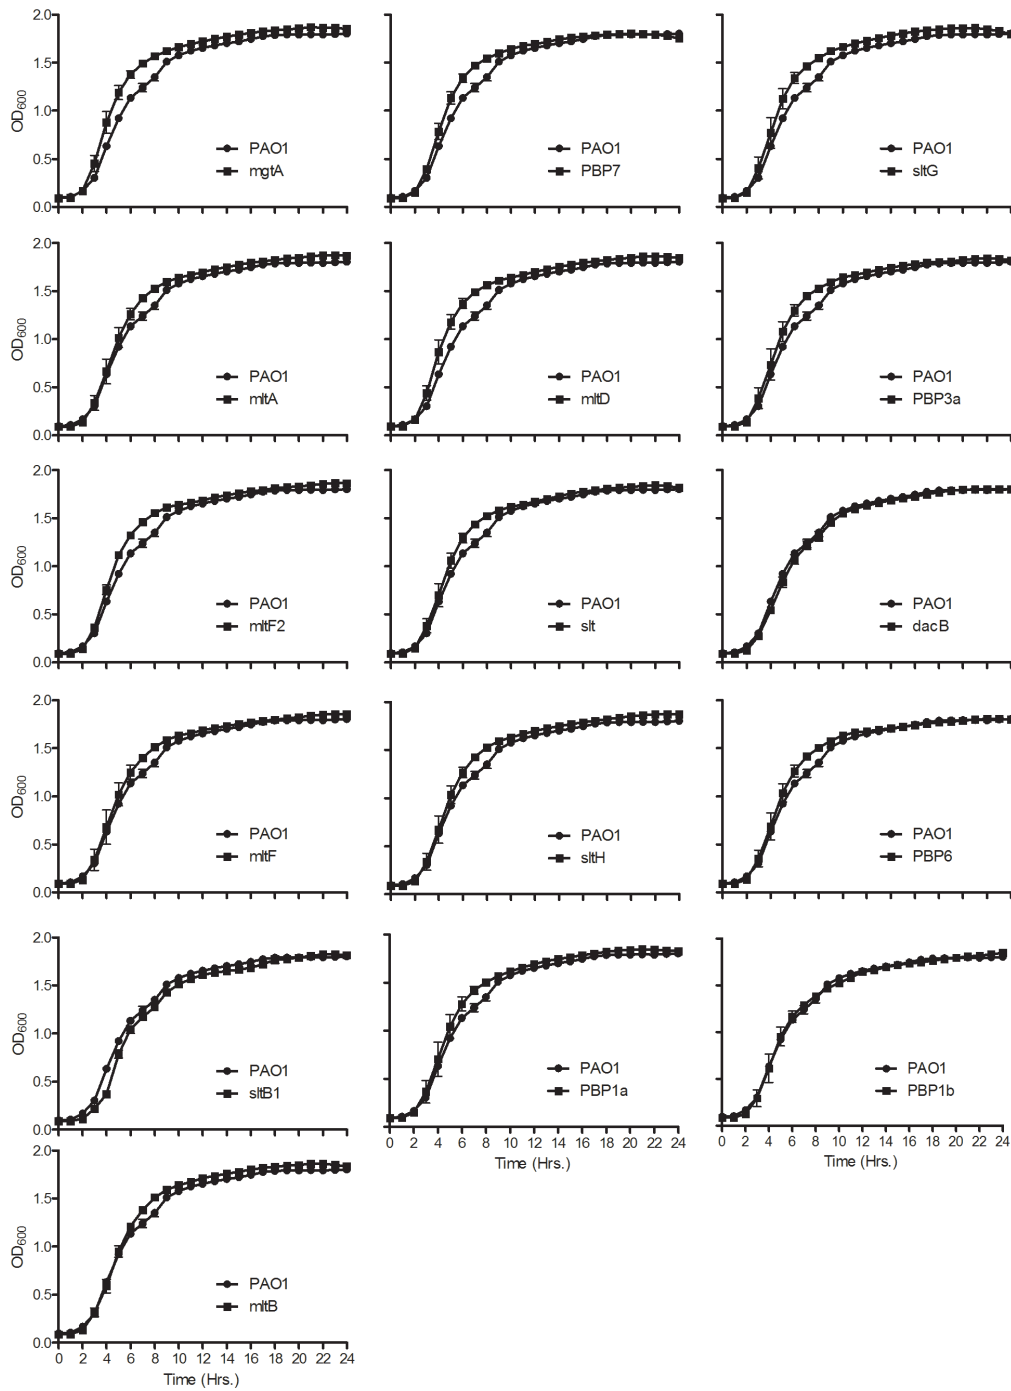

**SUPPLEMENTARY FIGURE 1. Loss of PG-active enzymes does not affect bacterial growth.** Bacterial growth ( $OD_{600nm}$ ) was monitored over a 24-hour period to detect abnormalities due to the loss of specific PG-active enzymes. The assay was performed using a plate-based assay (described below). N=3. Error bars represent the mean  $\pm$  standard error.

## **Bacterial growth assays**

Overnight bacterial cultures were sub-cultured 1:200 in Mueller-Hinton broth (MHB; Becton, Dickinson and Company, Mississauga, ON, Canada) and 300  $\mu\text{L}$  of each sample was aliquotted into triplicate wells of a sterile 100-well Honeycomb 2 plate (Oy Growth Curves Ab Ltd). Plates were incubated for 24 hours at 37°C with medium shaking in a Bioscreen C plate reader (Oy Growth Curves Ab Ltd) with  $\text{OD}_{600\text{nm}}$  reads every hour. Growth data were analyzed using GraphPad Prism software V5.0C.
